# Supplementary material for: Highly Efficient Protoplast Isolation and Transient Expression System for Functional Characterization of Flowering Related Genes in Cymbidium Orchids
Source: MDPI journal article supplement (doi:10.3390/ijms21072264), 2020-03-25
Supplement: s1 [file s1]

**Table S1.** Primer sequences used in this study

|                                        | Primer name    | Primer sequence (5'→3') *                                       |
|----------------------------------------|----------------|-----------------------------------------------------------------|
| Protein<br>subcellular<br>localization | PAN580-CsAP3-F | <u>CTTAAGTCCGGAGCTAGCTCTAGAGATGGGGAGAGGGAAGATAG</u>             |
|                                        | PAN580-CsAP3-R | <u>TCGCCCTTGCTCACCATGGATCCAGCGAGACGCAGATCATGAGG</u>             |
|                                        | PAN580-CsPI-F  | <u>CTTAAGTCCGGAGCTAGCTCTAGAGATGGGACGTGGAAAGATAG</u>             |
|                                        | PAN580-CsPI-R  | <u>TCGCCCTTGCTCACCATGGATCCCTTGTTCCCTGCAAGTTG</u>                |
| BiFC                                   | pSPYNE-CsAP3-F | <u>TGGAGAGAACACGGGGGACTCTAGAATGGGGAGAGGGAAGATAGAG</u>           |
|                                        | pSPYNE-CsAP3-R | <u>GTCGACAGTACTATCGATGGATCCAGCGAGACGCAGATCATGAGG</u>            |
|                                        | pSPYCE-CsPI-F  | <u>TGGAGAGAACACGGGGGACTCTAGAATGGGACGTGGAAAGATAG</u>             |
|                                        | pSPYCE-CsPI-R  | <u>GTCGACAGTACTATCGATGGATCCCTTGTTCCCTGCAAGTTG</u>               |
| Transient<br>expression                | O-FT-PAN-F     | <u>AGCTAGCTCTAGAGACGTCTCGAGGACCGGTCATGAATAGAGAGAGAGACTC</u>     |
|                                        | O-FT-PAN-R     | <u>ATTGCCAAATGTTTGAAGTGCAGCCGGGCGGCCGTCATCTGCATCCTTCTCCGC</u>   |
|                                        | O-SPV1-PAN-F   | <u>AGCTAGCTCTAGAGACGTCTCGAGGACCGGTCATGGCGAGGGAGAAGATACAGAT</u>  |
|                                        | O-SVP1-PAN-R   | <u>ATTGCCAAATGTTTGAAGTGCAGCCGGGCGGCCGTCACCTTCCAACCAGCACATGA</u> |
| qRT-PCR                                | Q-FT-F         | GGCAGGAAGTGATGTGCTATG                                           |
|                                        | Q-FT-R         | GCGAAGTCCCTGGTGTGA                                              |
|                                        | Q-SVP-F        | GCTTTCTATTCTTTGCGATGC                                           |
|                                        | Q-SVP-R        | GGTTTGATATGTTCCCTGACTG                                          |
|                                        | Q-SOC1-F       | GGGAAGGACGGAGATGAGG                                             |
|                                        | Q-SOC1-R       | ATCGCAGAGCACGGACAAC                                             |
|                                        | Q-AP1-F        | CTGAGGTCGCTCTAATCGTG                                            |
|                                        | Q-AP1-R        | GTGCCGTTTGCTCTTCTGT                                             |
|                                        | Q-LFY-F        | TTGGGGATTTGGGGTTTAC                                             |
|                                        | Q-LFY-R        | GATGATTGTGATGGTGGGAG                                            |
|                                        | CsUBQ-F        | CCGGATCAGCAAAGGTTGA                                             |
|                                        | CsUBQ-R        | AAGATTTGCATCCCTCCCC                                             |

\* The sequences on the lines are the fusion sequence.
